# Supplementary material
Source: Elsevier journal article supplement (https://www.sciencedirect.com/science/article/pii/S223878541930122X)

**Supplementary figures**

Supplementary figure 1. SEM images of fractured surface of B4C compacts; Sample 2, Tsintering=1800oC (a); Sample 3, Tsintering =1900oC (b).

Supplementary figure 2. SEM micrographs of B4C (sample 3) after the erosion test at 80 m∙s-1 particles velocity.

Supplementary figure 1.


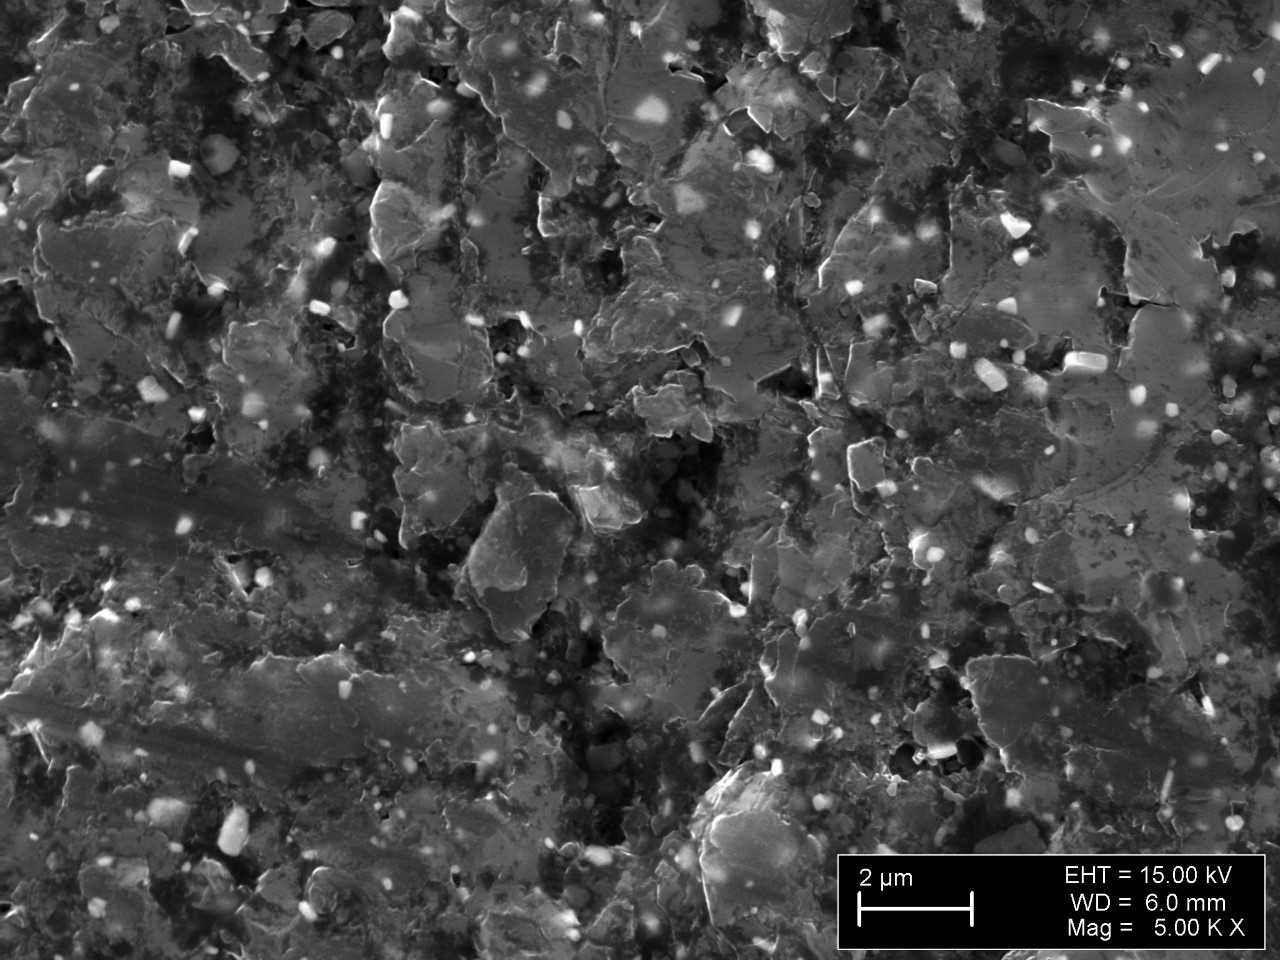

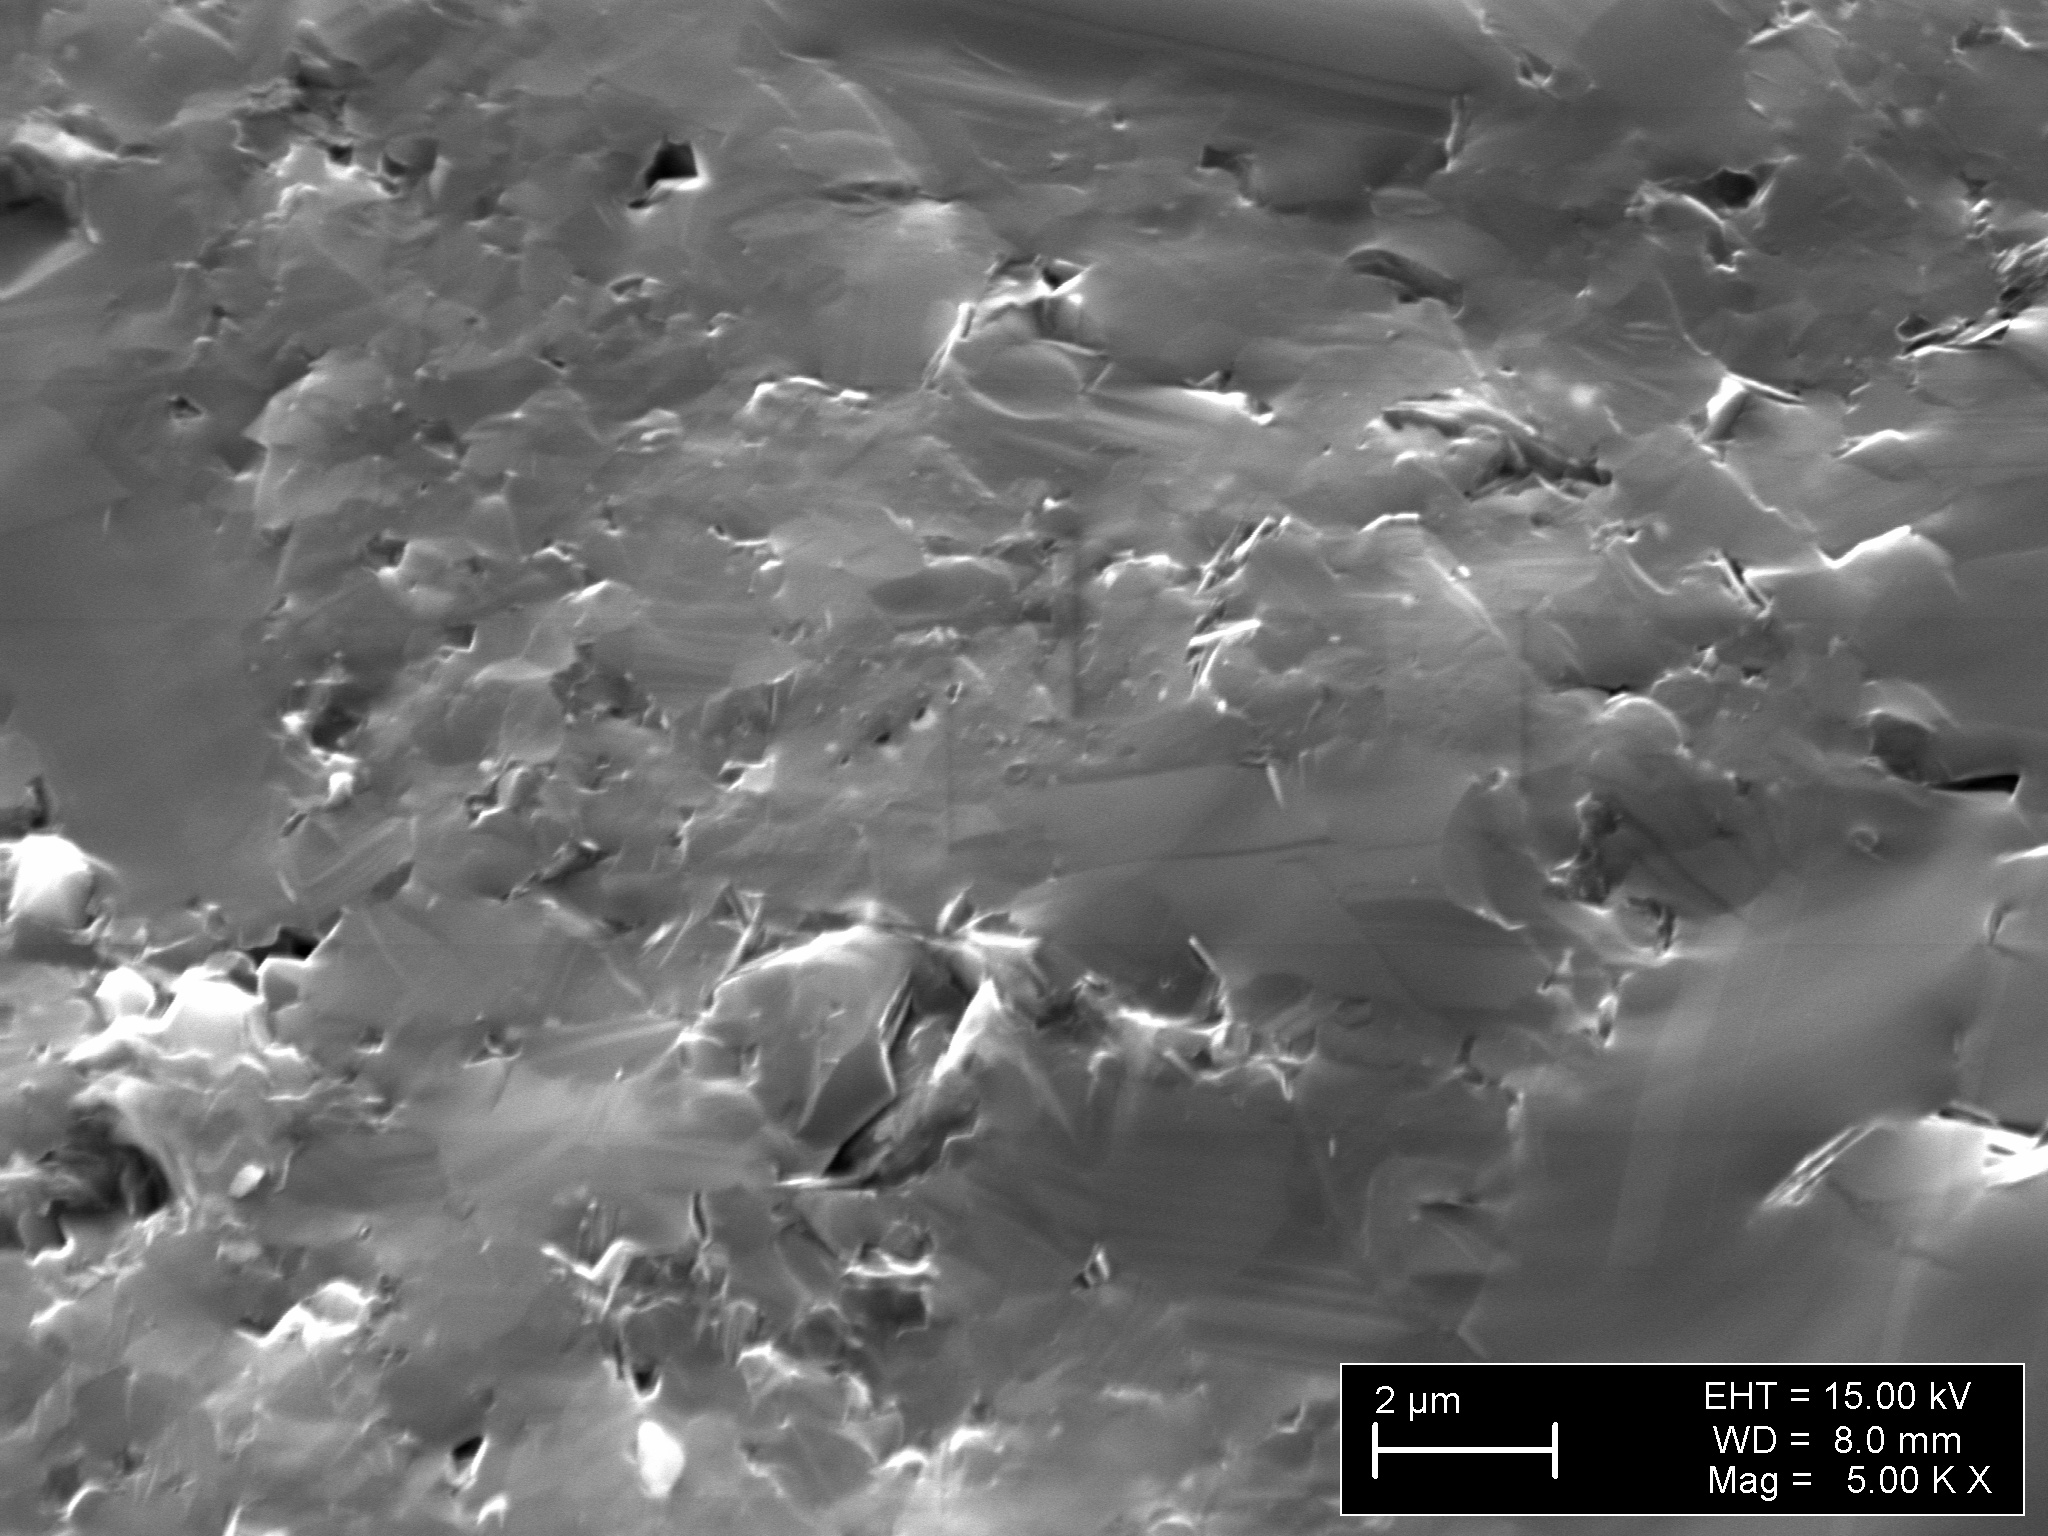


**(a)**

**(b)**

Supplementary figure 2.


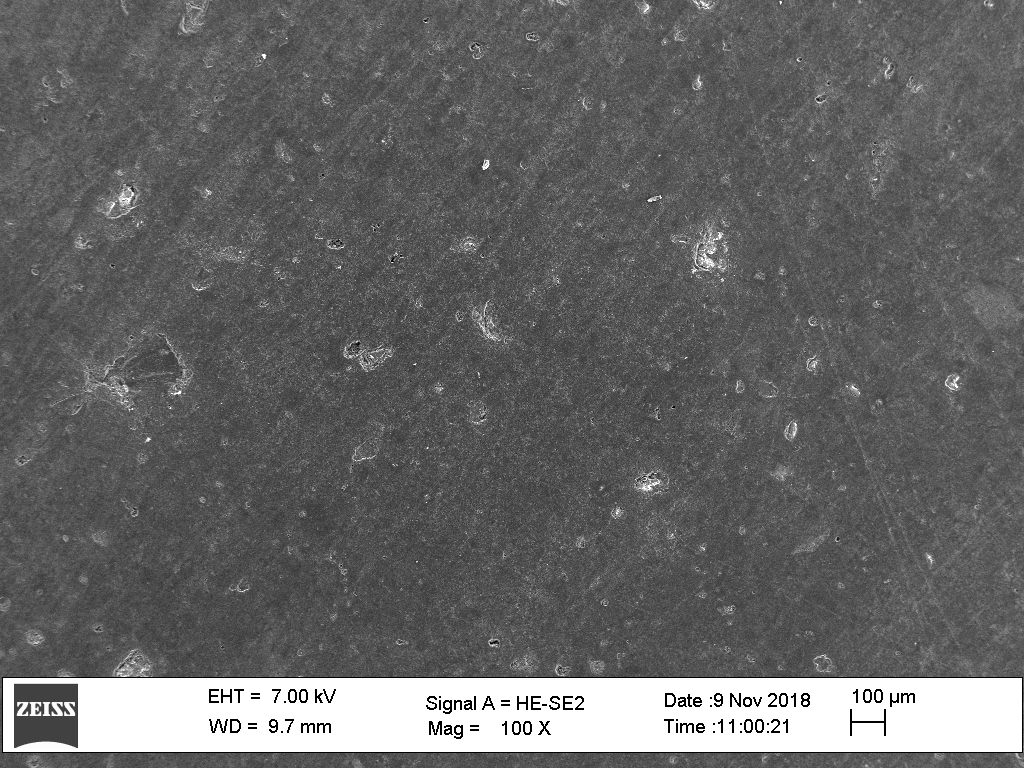

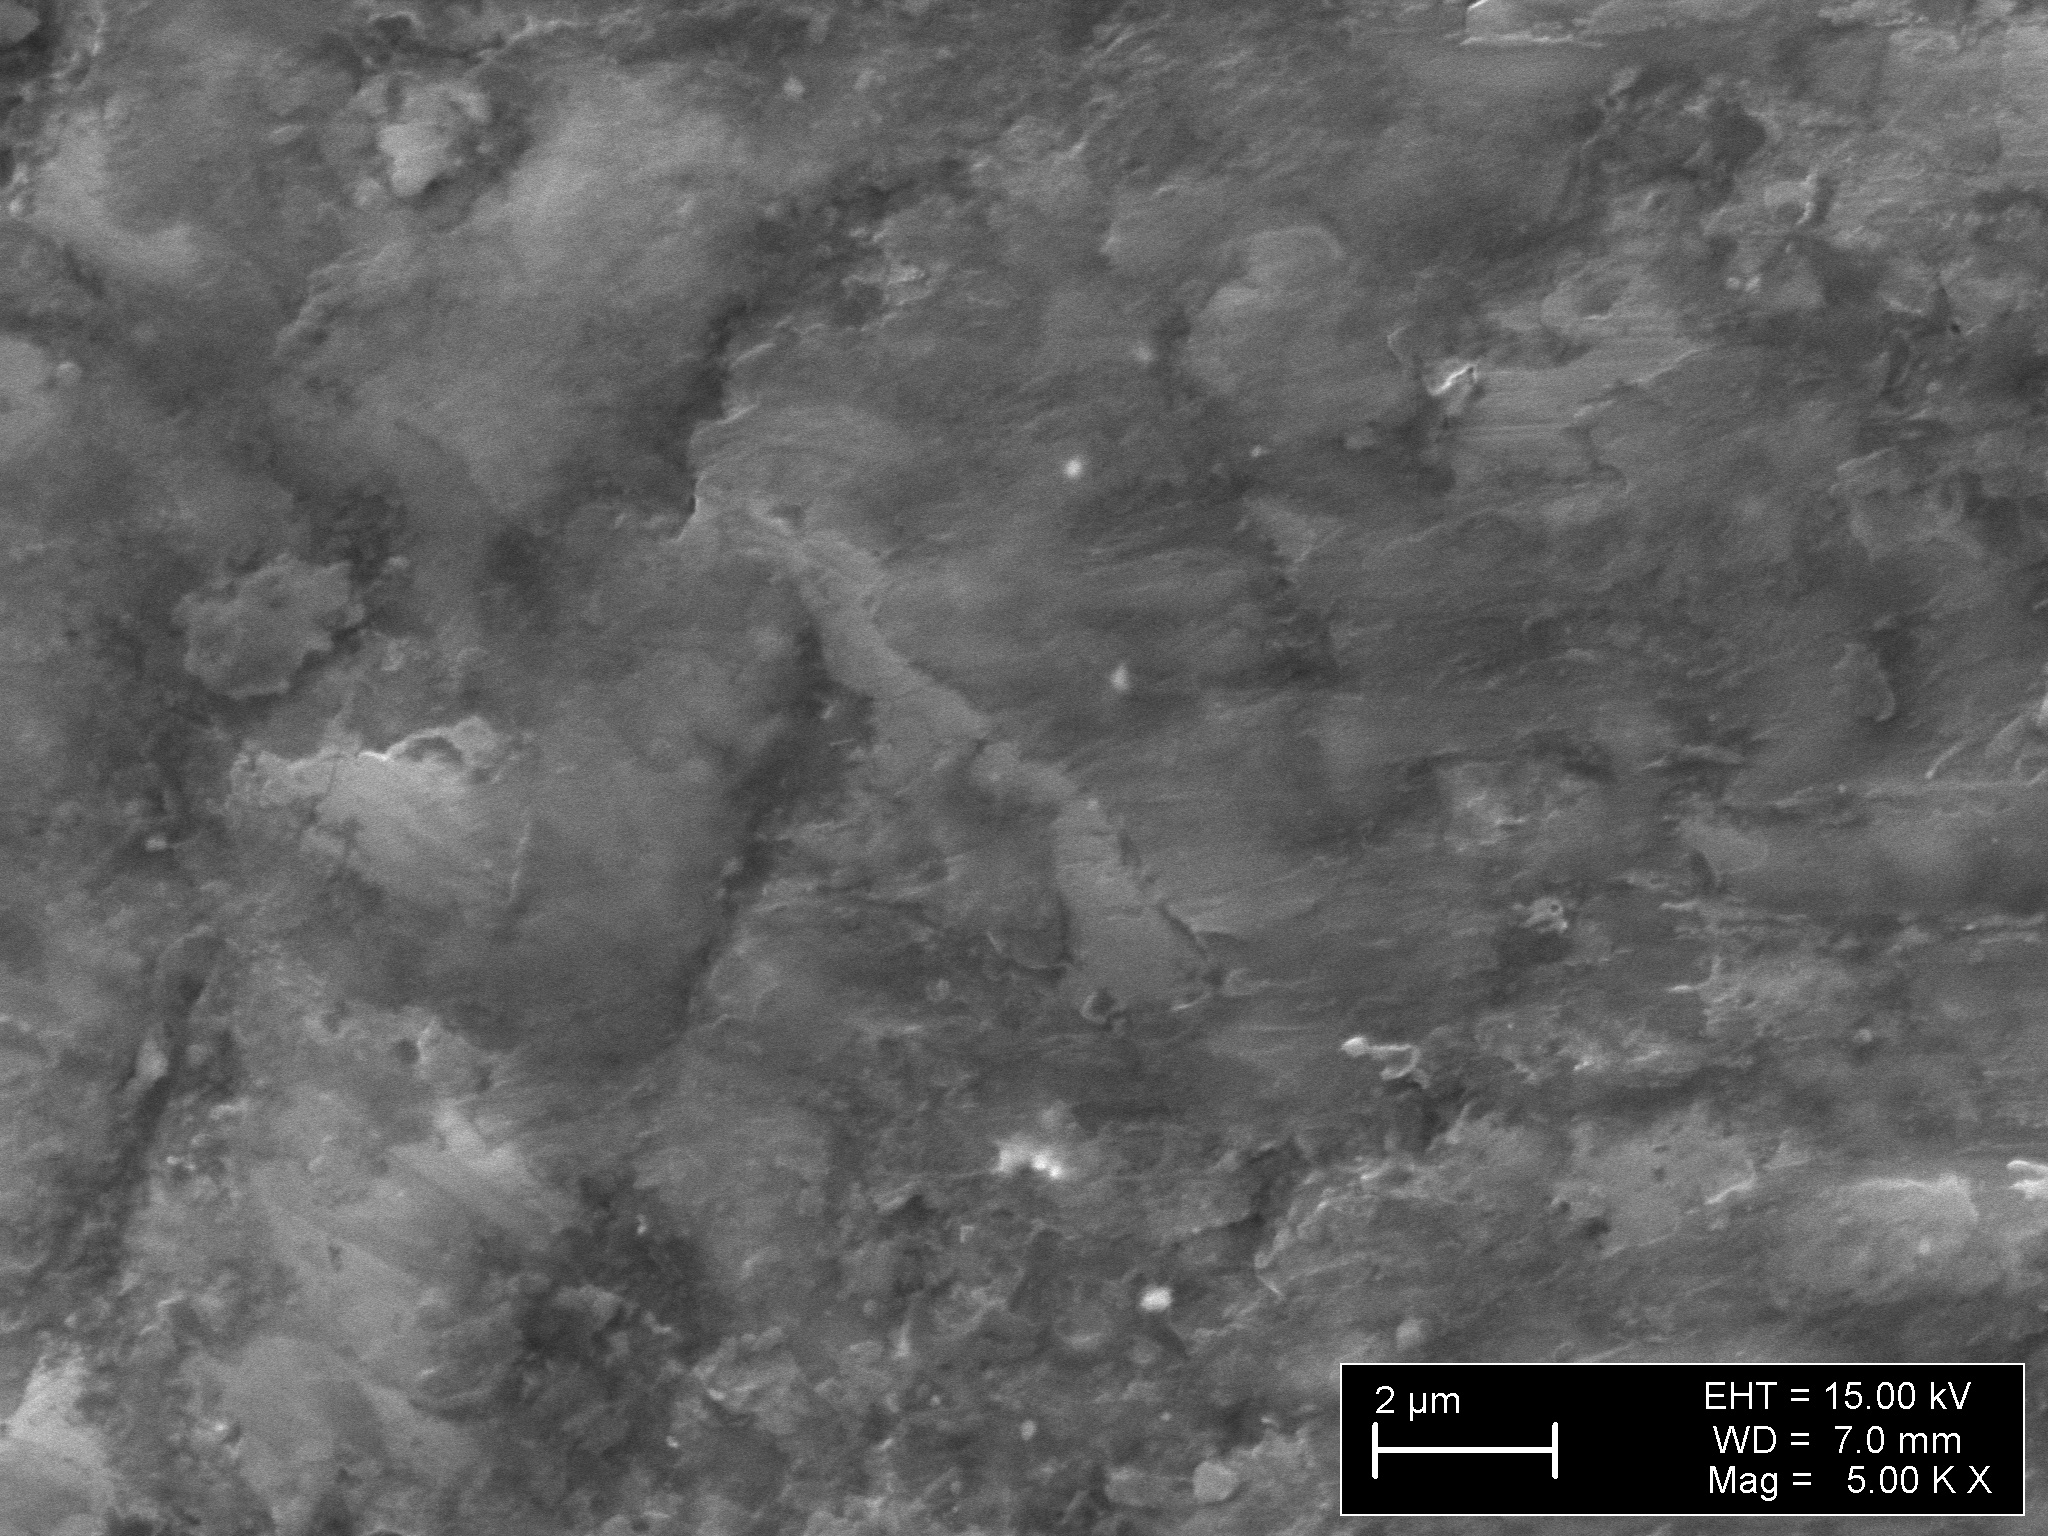

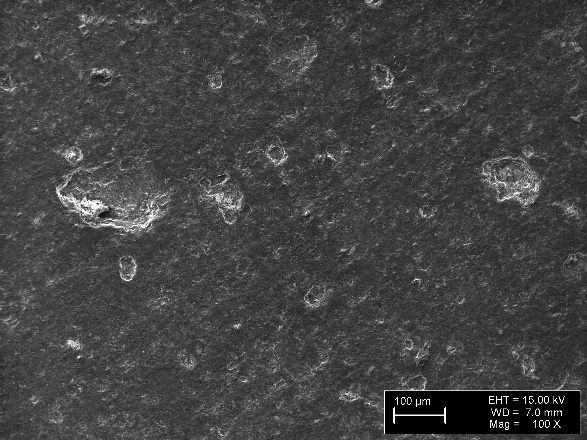

Supplement: mmc1 [file S223878541930122X:mmc1.doc]
